# Supplementary material for: Cultivation of Microalgae and Cyanobacteria: Effect of Operating Conditions on Growth and Biomass Composition
Source: PubMed Central journal article supplement (PMC7356364; doi:10.3390/molecules25122834), 2020-06-19
Supplement: molecules-25-02834-s001.pdf [file molecules-25-02834-s001.pdf]

## Supplementary material

# Cultivation of microalgae and cyanobacteria: Effect of operating conditions on growth and biomass composition

Alejandra Sánchez-Bayo <sup>1</sup>, Victoria Morales <sup>2</sup>, Rosalía Rodríguez <sup>1</sup>, Gemma Vicente <sup>1</sup>, Luis Fernando Bautista <sup>2,\*</sup>

<sup>1</sup> Department of Chemical, Energy and Mechanical Technology, ESCET, Universidad Rey Juan Carlos. C/ Tulipán s/n. 28933 Móstoles, Madrid, Spain.

<sup>2</sup> Department of Chemical and Environmental Technology, ESCET, Universidad Rey Juan Carlos. C/ Tulipán s/n. 28933 Móstoles, Madrid, Spain.

\*Corresponding author:

Luis Fernando Bautista

E-mail: [fernando.bautista@urjc.es](mailto:fernando.bautista@urjc.es)

**Table S1.** Composition of Guillard's F/2 <sup>1</sup> and Walne's media.

| Guillard's F/2 <sup>1</sup>                                       |                       | Walne's <sup>2</sup>                                                               |                       |
|-------------------------------------------------------------------|-----------------------|------------------------------------------------------------------------------------|-----------------------|
| Compound                                                          | Concentration (g/L)   | Compound                                                                           | Concentration (g/L)   |
| CoCl <sub>2</sub> ·6 H <sub>2</sub> O                             | 1.00·10 <sup>-4</sup> | ZnCl <sub>2</sub>                                                                  | 2.10·10 <sup>-4</sup> |
| Na <sub>2</sub> Mo <sub>7</sub> O <sub>4</sub> ·2H <sub>2</sub> O | 6.00·10 <sup>-6</sup> | CoCl·6 H <sub>2</sub> O                                                            | 2.00·10 <sup>-7</sup> |
| FeCl <sub>3</sub> ·6H <sub>2</sub> O                              | 3.00·10 <sup>-3</sup> | (NH <sub>4</sub> ) <sub>6</sub> Mo <sub>7</sub> O <sub>24</sub> ·4H <sub>2</sub> O | 9.00·10 <sup>-8</sup> |
| MnCl <sub>2</sub> ·4H <sub>2</sub> O                              | 1.80·10 <sup>-4</sup> | CuSO <sub>4</sub> ·5H <sub>2</sub> O                                               | 2.00·10 <sup>-7</sup> |
| Na <sub>2</sub> EDTA                                              | 4.65·10 <sup>-3</sup> | FeCl <sub>3</sub> ·6H <sub>2</sub> O                                               | 1.30·10 <sup>-3</sup> |
| NaH <sub>2</sub> PO <sub>4</sub> ·2H <sub>2</sub> O               | 5.65·10 <sup>-3</sup> | MnCl <sub>2</sub> ·4H <sub>2</sub> O                                               | 3.60·10 <sup>-4</sup> |
| NaNO <sub>3</sub>                                                 | 1.34·10 <sup>-1</sup> | H <sub>2</sub> BO <sub>3</sub>                                                     | 3.36·10 <sup>-2</sup> |
| CuSO <sub>4</sub>                                                 | 1.00·10 <sup>-5</sup> | EDTA                                                                               | 4.50·10 <sup>-2</sup> |
| ZnSO <sub>4</sub>                                                 | 2.20·10 <sup>-5</sup> | NaH <sub>2</sub> PO <sub>4</sub> ·2H <sub>2</sub> O                                | 2.50·10 <sup>-2</sup> |
| Vitamin B <sub>12</sub>                                           | 5.00·10 <sup>-7</sup> | NaNO <sub>3</sub>                                                                  | 1.00·10 <sup>-1</sup> |
| Vitamin B <sub>1</sub>                                            | 1.00·10 <sup>-4</sup> | TMS                                                                                | 1.00·10 <sup>-3</sup> |
| Vitamin H                                                         | 5.00·10 <sup>-6</sup> | Vitamin B <sub>12</sub>                                                            | 1.00·10 <sup>-4</sup> |
|                                                                   |                       | Vitamin B <sub>1</sub>                                                             | 1.00·10 <sup>-4</sup> |
|                                                                   |                       | Vitamin H                                                                          | 2.00·10 <sup>-4</sup> |

<sup>1</sup> Salinity: 0.1 g/L; <sup>2</sup> Salinity: 0.2 g/L

**Table S2:** Elemental composition (%wt) of *A. maxima* at different times (Growth conditions: 5:45 inoculum:culture medium ratio, 12:12 h light:dark photoperiod and MC1 medium).

| Time (d) | C (%)    | H (%)     | O (%)    | N (%)     | S (%)     |
|----------|----------|-----------|----------|-----------|-----------|
| 1        | 32±2     | 5.2±0.3   | 58±2     | 3.0±0.2   | 1.1±0.3   |
| 2        | 31±2     | 4.9±0.2   | 60±2     | 3.4±0.2   | 1.15±0.09 |
| 3        | 19.5±0.1 | 2.8±0.4   | 74.4±0.3 | 2.07±0.04 | 1.2±0.2   |
| 4        | 30±1     | 4.8±0.2   | 59±2     | 4.3±0.2   | 1.7±0.2   |
| 5        | 26.8±0.4 | 4.41±0.04 | 63.2±0.4 | 3.95±0.04 | 1.59±0.08 |
| 6        | 23.3±0.5 | 4.1±0.1   | 68.1±0.7 | 3.2±0.1   | 1.34±0.01 |
| 7        | 19±1     | 3.6±0.2   | 73±1     | 2.5±0.2   | 1.8±0.3   |

**Table S3:** Elemental composition (%wt) of *C. vulgaris* at different times (Growth conditions: 5:45 inoculum:culture medium ratio, 12:12 h light:dark photoperiod and MC4 medium).

| Time (d) | C (%)      | H (%)     | O (%)      | N (%)     | S (%)     |
|----------|------------|-----------|------------|-----------|-----------|
| 1        | 7±1        | 1.9±0.2   | 88±2       | 1.1±0.1   | 2.1±0.3   |
| 2        | 22±1       | 1.0±0.1   | 70±1       | 3.3±0.1   | 3.49±0.09 |
| 3        | 28±1       | 0.54±0.02 | 63±1       | 3.6±0.1   | 4.6±0.1   |
| 4        | 47±2       | 7.6±0.3   | 40±2       | 4.2±0.2   | 0.70±0.06 |
| 5        | 49±3       | 8.2±0.4   | 38.9±0.4   | 3.4±0.2   | 0.52±0.02 |
| 6        | 53±2       | 8.56±0.03 | 34±3       | 3.28±0.07 | 0.63±0.09 |
| 7        | 47.86±0.08 | 7.77±0.2  | 35.64±0.08 | 7.93±0.02 | 0.8±0.2   |

**Table S4:** Elemental composition (%wt) of *I. galbana* at different times (Growth conditions: 5:45 inoculum:culture medium ratio, 12:12 h light:dark photoperiod and MC3 medium).

| Time (d) | C (%)      | H (%)     | O (%)    | N (%)       | S (%)     |
|----------|------------|-----------|----------|-------------|-----------|
| 1        | 43±2       | 6.7±0.3   | 48±2     | 1.908±0.001 | 0.72±0.05 |
| 2        | 37.56±0.04 | 5.80±0.06 | 53.0±0.2 | 2.66±0.01   | 0.96±0.04 |
| 3        | 30.9±0.1   | 4.47±0.08 | 60.6±0.4 | 3.22±0.08   | 0.83±0.05 |
| 4        | 27.1±0.1   | 5.07±0.04 | 62.1±0.5 | 3.17±0.02   | 2.54±0.06 |
| 5        | 19.5±0.7   | 3.2±0.6   | 73±2     | 2.3±0.7     | 2.44±0.07 |
| 6        | 20±1       | 3.9±0.3   | 71±3     | 2.7±0.4     | 1.8±0.1   |
| 7        | 16±1       | 3.3±0.2   | 76±1     | 2.3±0.3     | 2.0±0.1   |

**Table S5:** Elemental composition (%wt) of *N. gaditana* at different times (Growth conditions: 5:45 inoculum:culture medium ratio, 12:12 h light:dark photoperiod and MC4 medium).

| Time (d) | C (%)      | H (%)     | O (%)      | N (%)     | S (%)     |
|----------|------------|-----------|------------|-----------|-----------|
| 1        | 47.1±0.2   | 6.92±0.09 | 38.9±0.5   | 6.4±0.1   | 0.60±0.20 |
| 2        | 45.5±0.8   | 6.6±0.2   | 40.7±0.9   | 6.47±0.05 | 0.64±0.04 |
| 3        | 45.42±0.03 | 6.75±0.01 | 40.80±0.01 | 6.43±0.01 | 0.59±0.01 |
| 4        | 43.4±0.03  | 6.25±0.01 | 42.97±0.03 | 6.75±0.05 | 0.64±0.01 |
| 5        | 46.5±0.4   | 6.74±0.07 | 39.9±0.2   | 6.2±0.1   | 0.58±0.01 |
| 6        | 46.4±0.05  | 6.64±0.07 | 40.0±0.6   | 6.39±0.07 | 0.58±0.01 |
| 7        | 46.9±0.9   | 6.9±0.1   | 39±1       | 6.55±0.06 | 0.65±0.02 |

**Table S6:** Characterisation of water samples from wastewater treatment plant located at Campus of Móstoles (Universidad Rey Juan Carlos).

|                                          | AD1                  | AD2    | AD3    |
|------------------------------------------|----------------------|--------|--------|
| Total hardness (mg/L)                    | 250                  | 200    | 210    |
| Chloride (ppm)                           | 280                  | 166    | 130    |
| BOD (mg/L)                               | 200                  | 50     | 0-5    |
| COD (mg/L)                               | 700                  | 200    | 150    |
| Total solids at 105°C (mg/L)             | 0.8                  | 0.66   | 0.5    |
| Total solids 155°C (mg/L)                | 0.44                 | 0.4    | 0.4    |
| Conductivity ( $\mu\text{S}/\text{cm}$ ) | 1600                 | 940    | 750    |
| Turbidity                                | 180                  | 12     | 4      |
| pH                                       | 7.06                 | 7.34   | 7.41   |
| [NO <sub>3</sub> <sup>-</sup> ] (ppm)    | 3.5                  | 6.9    | 59.41  |
| TOC                                      | 150                  | 35     | 20     |
| Elements (ppm)                           |                      |        |        |
| B                                        | 0.106                | 0.246  | 0.018  |
| Co                                       | $6.11 \cdot 10^{-4}$ | 0      | 0      |
| Cu                                       | 0.042                | 0.012  | 0.013  |
| Fe                                       | 0.100                | 0.163  | 0.159  |
| K                                        | 36.120               | 25.644 | 18.406 |
| Mg                                       | 10.651               | 6.265  | 4.944  |
| Mo                                       | 0.054                | 0.044  | 0.044  |
| P                                        | 6.539                | 5.962  | 2.999  |
| Zn                                       | 1.032                | 0.065  | 0.053  |

**Table S7:** Phosphorous depletion in wastewater AD2. (Growth conditions: 5:45 inoculum:culture medium ratio, 12:12 h light:dark photoperiod).

| Microalga                       | P (% depletion) |
|---------------------------------|-----------------|
| <i>Arthrospira maxima</i>       | 95.4±0.2        |
| <i>Chlorella vulgaris</i>       | 8.48±0.02       |
| <i>Isochrysis galbana</i>       | 99.1±0.2        |
| <i>Nannochloropsis gaditana</i> | 65.1±0.1        |

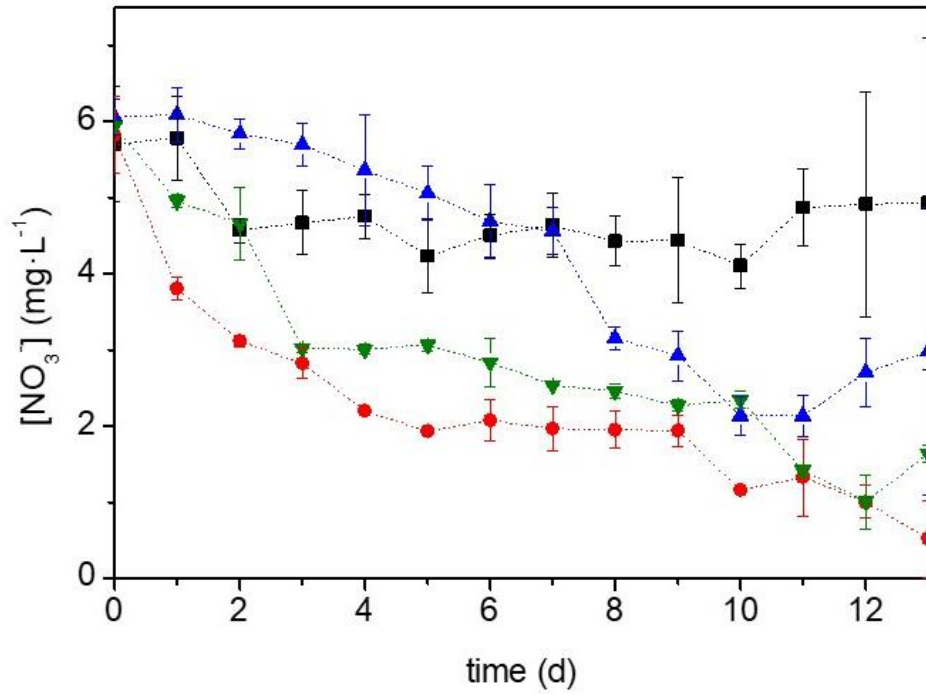

**Figure S1:** Nitrate uptake in wastewater AD2: ■ *A. maxima*, ● *C. vulgaris*, ▲ *I. galbana* and ▼ *N. gaditana*. (Growth conditions: 5:45 inoculum:culture media ratio, 12:12 h light:dark photoperiod).
